# Supplementary material for: Nutritional Assessment of School Children in AlMadinah AlMunawarah City: A Cross-Sectional Study
Source: Research Square preprint supplement (doi:10.21203/rs.3.rs-8041088/v1), 2025-12-31
Supplement: Supplementary file 1 [file 91f39c16a8f3081ffa127ae0.docx]

Name(optional):

Age:

Gender:

Class:

WT: HT:

**Nutrition Questionnaire**
**What Have You Been Eating Lately?**

During the past 4 weeks, how often did you eat

a serving of each of the foods listed here?

**Mark only one X for each food**

**Example:**

|  | **last 4**  **weeks** | | **each week** | | | **each day** | | | |
| --- | --- | --- | --- | --- | --- | --- | --- | --- | --- |
| Number of times | 0 | 1-3 | 1 | 2-4 | 5-6 | 1 | 2-3 | 4-5 | 6+ |
| Milk |  |  |  | **X** |  |  |  |  |  |
| Hot chocolate | **X** |  |  |  |  |  |  |  |  |

|  | **last 4**  **weeks** | | **each week** | | | **each day** | | | |
| --- | --- | --- | --- | --- | --- | --- | --- | --- | --- |
| Number of times | 0 | 1-3 | 1 | 2-4 | 5-6 | 1 | 2-3 | 4-5 | 6+ |
| Milk |  |  |  |  |  |  |  |  |  |
| Hot chocolate |  |  |  |  |  |  |  |  |  |
| Cheese, plain or in sandwiches |  |  |  |  |  |  |  |  |  |
| Yogurt |  |  |  |  |  |  |  |  |  |
| Ice cream (cones, sandwiches, sundaes) |  |  |  |  |  |  |  |  |  |
| Pudding |  |  |  |  |  |  |  |  |  |

8

7

6

5

4

3

2

1

0

What kind of milk do you usually drink? (Check one)

Hot chocolate

whole

7

5

3

1%

______ :Other

8

6

2%

4

Skim

|  | **last 4**  **weeks** | | **each week** | | | **each day** | | | |
| --- | --- | --- | --- | --- | --- | --- | --- | --- | --- |
| Number of times | 0 | 1-3 | 1 | 2-4 | 5-6 | 1 | 2-3 | 4-5 | 6+ |
| Orange juice or grapefruit juice |  |  |  |  |  |  |  |  |  |
| Pineapple |  |  |  |  |  |  |  |  |  |
| Guava |  |  |  |  |  |  |  |  |  |
| Banana |  |  |  |  |  |  |  |  |  |
| Peaches |  |  |  |  |  |  |  |  |  |
| Fruit cocktail, mixed fruit |  |  |  |  |  |  |  |  |  |
| Orange or grapefruit |  |  |  |  |  |  |  |  |  |
| Apple or pear |  |  |  |  |  |  |  |  |  |
| Cherry |  |  |  |  |  |  |  |  |  |
| Grapes |  |  |  |  |  |  |  |  |  |
| Strawberries |  |  |  |  |  |  |  |  |  |
| Melon |  |  |  |  |  |  |  |  |  |
| Other juices |  |  |  |  |  |  |  |  |  |
| Other Fruits |  |  |  |  |  |  |  |  |  |

6

0

8

7

3

2

1

4

5

|  | **last 4**  **weeks** | | **each week** | | | **each day** | | | |
| --- | --- | --- | --- | --- | --- | --- | --- | --- | --- |
| Number of times | 0 | 1-3 | 1 | 2-4 | 5-6 | 1 | 2-3 | 4-5 | 6+ |
| Corn |  |  |  |  |  |  |  |  |  |
| Peas |  |  |  |  |  |  |  |  |  |
| Tomatoes, tomato sauce, salsa |  |  |  |  |  |  |  |  |  |
| Peppers (green, red or hot) |  |  |  |  |  |  |  |  |  |
| Carrots |  |  |  |  |  |  |  |  |  |
| Broccoli |  |  |  |  |  |  |  |  |  |
| Green beans |  |  |  |  |  |  |  |  |  |
| Spinach |  |  |  |  |  |  |  |  |  |
| Greens (mustard, turnip, kale) |  |  |  |  |  |  |  |  |  |
| Mixed vegetables |  |  |  |  |  |  |  |  |  |
| Squash, orange or winter |  |  |  |  |  |  |  |  |  |
| Zucchini, yellow squash |  |  |  |  |  |  |  |  |  |
| French fries, fried potatoes, tater tots |  |  |  |  |  |  |  |  |  |
| Potatoes (baked, boiled, or mashed) |  |  |  |  |  |  |  |  |  |
| Sweet potatoes or yams |  |  |  |  |  |  |  |  |  |
| Cabbage, coleslaw or cauliflower |  |  |  |  |  |  |  |  |  |
| Lettuce salad |  |  |  |  |  |  |  |  |  |
| Salad dressing | 0  0 | 1  1 | 2  2 | 3  3 | 4  5  4 |  | 6  5  6 | 7  7 | 8  8 |

|  | **last 4**  **weeks** | | **each week** | | | **each day** | | | |
| --- | --- | --- | --- | --- | --- | --- | --- | --- | --- |
| Number of times | 0 | 1-3 | 1 | 2-4 | 5-6 | 1 | 2-3 | 4-5 | 6+ |
| Popcorn or pretzels |  |  |  |  |  |  |  |  |  |
| Crackers |  |  |  |  |  |  |  |  |  |
| Nuts |  |  |  |  |  |  |  |  |  |
| Cookies or brownies |  |  |  |  |  |  |  |  |  |
| Pie |  |  |  |  |  |  |  |  |  |
| Jello |  |  |  |  |  |  |  |  |  |
| Chocolate or candy bar |  |  |  |  |  |  |  |  |  |
| Other candy (not chocolate) |  |  |  |  |  |  |  |  |  |
| Coffee or tea |  |  |  |  |  |  |  |  |  |
| Soda, soft drink, pop (not sugar free) |  |  |  |  |  |  |  |  |  |
| Soda, soft drink, pop (sugar free) |  |  |  |  |  |  |  |  |  |

|  | **last 4**  **weeks** | | **each week** | | | **each day** | | | |
| --- | --- | --- | --- | --- | --- | --- | --- | --- | --- |
| Number of times | 0 | 1-3 | 1 | 2-4 | 5-6 | 1 | 2-3 | 4-5 | 6+ |
| Beans (baked, chili, or other) |  |  |  |  |  |  |  |  |  |
| Rice |  |  |  |  |  |  |  |  |  |
| Spaghetti or other pasta |  |  |  |  |  |  |  |  |  |
| Pizza |  |  |  |  |  |  |  |  |  |
| Cheese Macaroni |  |  |  |  |  |  |  |  |  |
| Hot dogs |  |  |  |  |  |  |  |  |  |
| Hamburger (prepared any way) |  |  |  |  |  |  |  |  |  |
| Canned tuna |  |  |  |  |  |  |  |  |  |
| Fried fish, fish sticks |  |  |  |  |  |  |  |  |  |
| Other fish |  |  |  |  |  |  |  |  |  |
| Fried chicken, chicken nuggets |  |  |  |  |  |  |  |  |  |
| Other chicken or turkey |  |  |  |  |  |  |  |  |  |
| Roast beef or steak |  |  |  |  |  |  |  |  |  |
| Liver, organ meats |  |  |  |  |  |  |  |  |  |
| Peanut butter |  |  |  |  |  |  |  |  |  |
| Bread (slice) toast, roll, or pita |  |  |  |  |  |  |  |  |  |
| Butter (not margarine) |  |  |  |  |  |  |  |  |  |
| Margarine |  |  |  |  |  |  |  |  |  |

8

7

6

5

4

3

2

1

0

8

7

5

6

4

3

2

1

0

|  | **last 4**  **weeks** | | **each week** | | | **each day** | | | |
| --- | --- | --- | --- | --- | --- | --- | --- | --- | --- |
| Number of times | 0 | 1-3 | 1 | 2-4 | 5-6 | 1 | 2-3 | 4-5 | 6+ |
| Vegetable soup |  |  |  |  |  |  |  |  |  |
| Other soup |  |  |  |  |  |  |  |  |  |
| Cornbread or tortilla |  |  |  |  |  |  |  |  |  |
| Eggs |  |  |  |  |  |  |  |  |  |
| Hot cereal, grits |  |  |  |  |  |  |  |  |  |
| Cold cereal |  |  |  |  |  |  |  |  |  |
| Donut |  |  |  |  |  |  |  |  |  |
| Sweet roll or muffin |  |  |  |  |  |  |  |  |  |
| Pancake, waffle, or French toast |  |  |  |  |  |  |  |  |  |
| English muffin or bagel |  |  |  |  |  |  |  |  |  |
| Biscuit |  |  |  |  |  |  |  |  |  |

1. What type of bread do you usually eat?

White Whole Wheat About Half I DON’T

3

4

2

1

2. What type of margarine do you usually use?

Stick Tub Squeeze

3

1

2

Is this margarine:

Fat Free Corn oil other

3

1

2

3. If you eat cold breakfast cereal, what type?

High Fiber (All Bran) other (Corn Flakes)

1

21

4. Do you take a multi-vitamin pill?

Yes No

1

0

If yes, how often:

Every day 4–6 times a week

2

1

1–3 times a week Less than one time a week

4

3

5. Do you take a separate iron pill (not in the multi-vitamin pill above):

No Yes

1

0

6. Do you take a separate vitamin A supplement (not in the multi-vitamin pill above):

No Yes

1

0

7. Do you take a separate calcium supplement (not in the multi-vitamin pill above):

No Yes

1

0

8. Do you eat fried food at home:

No Yes

1

0

If yes, how often:

Every day 4–6 times a week

2

1

1–3 times a week Less than one time a week

4

3

If yes, what type of fat do you use to fry at home:

Butter margarine corn oil

3

2

1

canola oil olive oil other vegetable oil

6

5

4

9. Do you bake cookies, cake or pies at home:

No Yes

0

1

If yes, how often do you eat home-baked cookies, cake, or pies:

Every day 4–6 times a week

2

1

1–3 times a week Less than one time a week

4

3

If yes, what type of fat do you use to fry at home:

Butter margarine corn oil

3

2

1

canola oil olive oil other vegetable oil

6

5

4

0/do you watch T.V while eating?1

No Yes

1

0

11/how much time you spend on T.V?

**
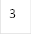

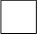

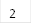

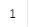
** Less than hour from 1-3 hours more than 3 hours

12/do you have a continues physical activity weekly or even daily?

No Yes

1

0

13/how long is your physical activity last?


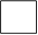
Less than 20 min


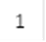


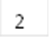
**
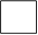
**From20-60min


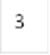
**
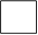
**More than 60 min
